# Supplementary material for: Horizontal and vertical structure of reactive bromine events probed by bromine monoxide MAX-DOAS
Source: Copernicus journal article supplement (doi:10.5194/acp-17-9291-2017), 2017-08-04
Supplement: Supplementary file 2 [file acp-17-9291-2017-supplement.zip]

Archive with 3 entries (3 files):
- BROMEX-Gradients-26Jul2017-supplement-no-title.pdf
- acp-17-9291-2017-supplement-title-page.pdf
- BROMEX_animate.gif
