# Supplementary material for: Horizontal and vertical structure of reactive bromine events probed by bromine monoxide MAX-DOAS
Source: Copernicus journal article supplement (doi:10.5194/acp-17-9291-2017), 2017-08-04
Supplement: Supplementary file 2 [file acp-17-9291-2017-supplement.zip › acp-17-9291-2017-supplement-title-page.pdf]

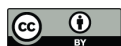

*Supplement of*

## **Horizontal and vertical structure of reactive bromine events probed by bromine monoxide MAX-DOAS**

**William R. Simpson et al.**

*Correspondence to:* William R. Simpson ([wrsimpson@alaska.edu](mailto:wrsimpson@alaska.edu))

- [acp-17-9291-2017-supplement-title-page.pdf](#)
- [BROMEX-Gradients-26Jul2017-supplement-no-title.pdf](#)
- [BROMEX\\_animate.gif](#)

The copyright of individual parts of the supplement might differ from the CC BY 3.0 License.
